# Supplementary material for: Tin sulfide modified separator as an efficient polysulfide trapper for stable cycling performance in Li–S batteries
Source: Royal Society of Chemistry journal article supplement (doi:10.1039/c8nh00172c), 2018-09-19
Supplement: c8nh00172c1.pdf [file c8nh00172c1.pdf]

## Supplemental Information

### Tin Sulfide Modified Separator as an Efficient Polysulfide Trapper for Stable Cycling Performance in Li-S Batteries

*Brindha Moorthy<sup>a</sup>, Soonho Kwon<sup>a</sup>, Joo-Hyung Kim<sup>a</sup>, P. Ragupathy<sup>a,b\*</sup>, Hyuck Mo Lee<sup>a</sup> and Do Kyung Kim<sup>a\*</sup>*

- a. Department of Materials Science and Engineering, Korea Advanced Institute of Science and Technology (KAIST), 291 Daehak-ro, Yuseong-gu, Daejeon, 34141, Republic of Korea  
E-mail: [dkkim@kaist.ac.kr](mailto:dkkim@kaist.ac.kr)
- b. Electrochemical Power Sources Division, CSIR-Central Electrochemical Research Institute, Karaikudi 630003, Tamil Nadu, (India)  
Email: [ragupathyp@cecri.res.in](mailto:ragupathyp@cecri.res.in)

\* To whom all correspondence should be addressed.

#### Experimental section

##### Chemicals and materials

All analytical grade chemicals such as tin chloride pentahydrate ( $\text{SnCl}_4 \cdot 5\text{H}_2\text{O}$ ), thioacetamide (TAA), sublimed sulfur, Ketjen black (KB), polyvinylidene fluoride (PVDF), N-methylpyrrolidinone (NMP), lithium bis(trifluoromethanesulfonyl)imide (LiTFSI, 98%, Acros Organics), Lithium nitrate ( $\text{LiNO}_3$ ), 1,2-dimethoxyethane (DME) and 1, 3-dioxolane (DOL) were purchased from Sigma Aldrich. All chemical reagents were used as received without any further purification

##### Synthesis of $\text{SnS}_2$ nanosheets

$\text{SnS}_2$  nanosheets were synthesized by a simple hydrothermal route. In a typical synthesis, 5 mmol of tin-chloride pentahydrate ( $\text{SnCl}_4 \cdot 5\text{H}_2\text{O}$ ) and 20 mmol of thioacetamide (TAA) were dissolved in 60 ml of deionized water to form a transparent solution. The dissolved precursor solution was transferred into a stainless-steel autoclave with a Teflon liner (80 mL in volume), which was then placed into a preheated electric oven at 160 °C for 12

hours. After the reaction, yellow-colored SnS<sub>2</sub> nanosheets were collected, centrifuged and dried overnight at 70 °C.

### **Preparation of the SnS<sub>2</sub>-modified separator**

A simple slurry casting method utilizing a doctor blade was used to prepare the SnS<sub>2</sub>-modified separator. A mixture of SnS<sub>2</sub> nanosheets, KB, and PVDF with a weight ratio of 70:20:10 (wt%) was dispersed in NMP solvent to form a slurry. The obtained slurry was cast onto one side of a commercial polypropylene separator (Celgard) using a doctor blade (referred to as the SnS<sub>2</sub>-modified separator). The slurry-cast separator was dried overnight in a vacuum oven at 60 °C. After drying, the SnS<sub>2</sub>-modified separator was cut into a circular disk with a diameter of 18 mm. The mass loading for the coating on the separator was approximately 0.6 mg.

### **Polysulfide adsorption test**

Li<sub>2</sub>S<sub>8</sub> solution was prepared by chemically reacting sublimed sulfur with an appropriate amount of Li<sub>2</sub>S in DOL/DME solution (1:1 by volume). The solution was then vigorously stirred overnight at 80 °C in an Ar-filled glove box to produce a brownish-red Li<sub>2</sub>S<sub>8</sub> solution (0.5 M). 0.001 M Li<sub>2</sub>S<sub>8</sub> solution was used for the polysulfide adsorption test. 20 mg of SnS<sub>2</sub> powder was added to 5.0 ml of Li<sub>2</sub>S<sub>8</sub> solution, and the mixtures stirred to obtain thorough adsorption. A blank glass vial was also filled with the same amount of Li<sub>2</sub>S<sub>8</sub> solution for comparison. The solution was allowed to settle, and the supernatant solution used for UV-Visible analysis.

### **Physico-chemical characterization**

The crystal structure and phase purity of the synthesized materials was assessed using powder X-ray diffraction (XRD) patterns, which were recorded by an XRD, RIKAGU, D/Max-2500 with Cu K $\alpha$  ( $\lambda = 1.5418 \text{ \AA}$ ) as source. The morphological characteristics of the samples were analyzed using an FE-SEM (FE-SEM, Magellan400, FEI). UV-Visible spectroscopy was carried out using a Lambda 1050 (Perkin Elmer). To investigate

interactions between the SnS<sub>2</sub> nanosheets and LiPSs, XPS spectra were obtained using a multilab 2000 (Thermo Scientific, UK). Raman spectroscopy was carried out using a Lab RAM HR Evolution (HORIBA, Japan) Raman system with laser excitation at a wavelength of 514 nm. The contact angle measurement of the separators was measured on Kruss DSA100 Goniometer. The electrical conductivity was measured by 4-probe method. A Denver microbalance model CE10 (0111) with a sensitivity of 10 µg was used for weighing the materials and electrodes.

### **Sulfur composite electrode preparation and electrochemical characterization**

The composition of the sulfur electrodes was as follows: 70 wt% elemental sulfur, 15 wt% conductive additive (Ketjen black), and 15 wt% binder (Teflonized acetylene black). The electrode slurry was then pressured over a stainless-steel mesh, followed by drying at 60 °C under vacuum for 12 hours. The sulfur loading of the electrode was 3.1 mg cm<sup>-2</sup>. A 2032-type coin cell was assembled in an argon-filled glovebox by sandwiching the sulfur cathode, SnS<sub>2</sub>-modified separator/ pristine Celgard separator (for control experiments) and lithium foil anode (Alfa Aesar). The electrolyte consisted of 30 µL of 1 M Lithium bis(trifluoromethanesulfonyl)imide (LITFSI) in a mixed solvent of 1,3-dioxalane (DOL) and 1,2-dimethoxyethane (DME) (1:1 by volume), including 0.2 mol % of LiNO<sub>3</sub> as additives. Galvanostatic charge-discharge measurements were carried out using a battery cycler (WBS3000, Wonatech) over the potential range of 1.8-2.8 V vs. Li/Li<sup>+</sup> at 25 °C. Cyclic voltammetry and impedance spectroscopy were recorded using a Bio-logic electrochemical workstation (VMP3).

### **Computational methods**

All DFT calculations were carried out using the Vienna *ab initio* simulation package (VASP) code.<sup>1,2</sup> Electron exchange and correlation were treated within the generalized gradient approximation (GGA) in the form of the Perdew-Burke-Ernzerhof (PBE) functional.<sup>3</sup> The PBE-D3 method was employed to correct for the van der Waals interaction.<sup>4</sup> The interaction between the ionic core and the valence electrons was described by the

projector-augmented wave (PAW) method,<sup>5</sup> with use of a plane-wave cutoff energy of 500 eV. The Brillouin zones were sampled by a 3×3×1 Gamma-centered k-point grid. The binding energy was defined as

$$E_{ads}^{Li_2Sn} = E_{Li_2Sn/sub} - [E_{sub} + E_{Li_2Sn}]$$

Where  $E_{Li_2Sn/sub}$  is the total energy for the  $Li_2Sn/sub$  and  $E_{Li_2Sn}$  and  $E_{sub}$  are the energies of a freestanding  $Li_2Sn$  species and corresponding substrate, respectively.

## Supporting Figures

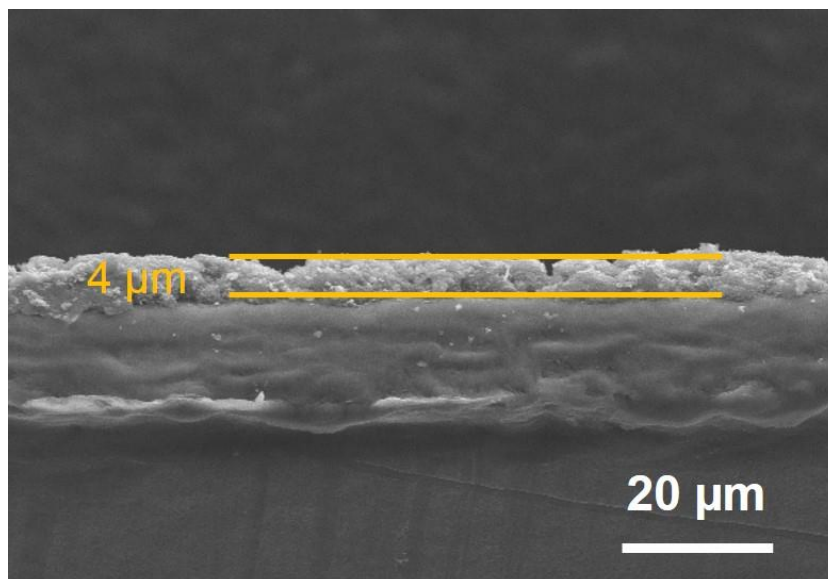

**Fig. S1.** Cross-sectional image of the SnS<sub>2</sub>-modified separator.

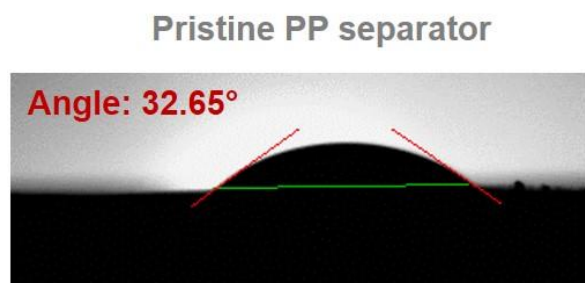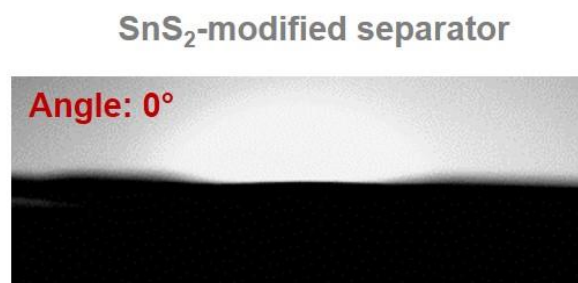

**Fig. S2.** Dynamic electrolyte contact angle measurements for pristine and SnS<sub>2</sub>-modified separator respectively.

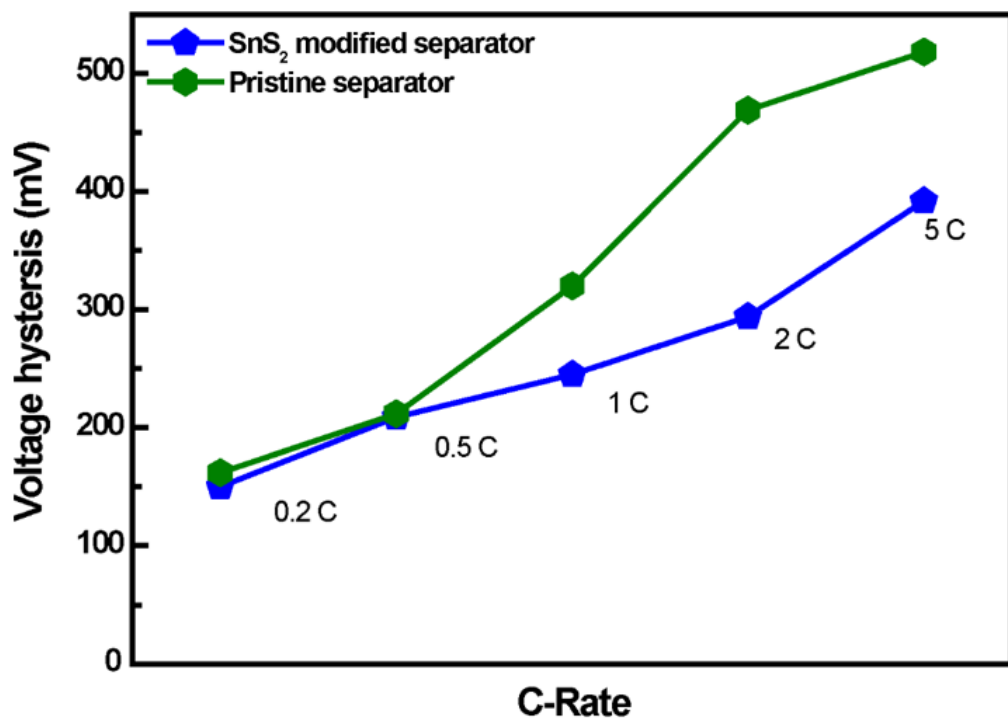

**Fig. S3.** The voltage hysteresis at various current rates of the Li-S cell with SnS<sub>2</sub> modified and pristine separator.

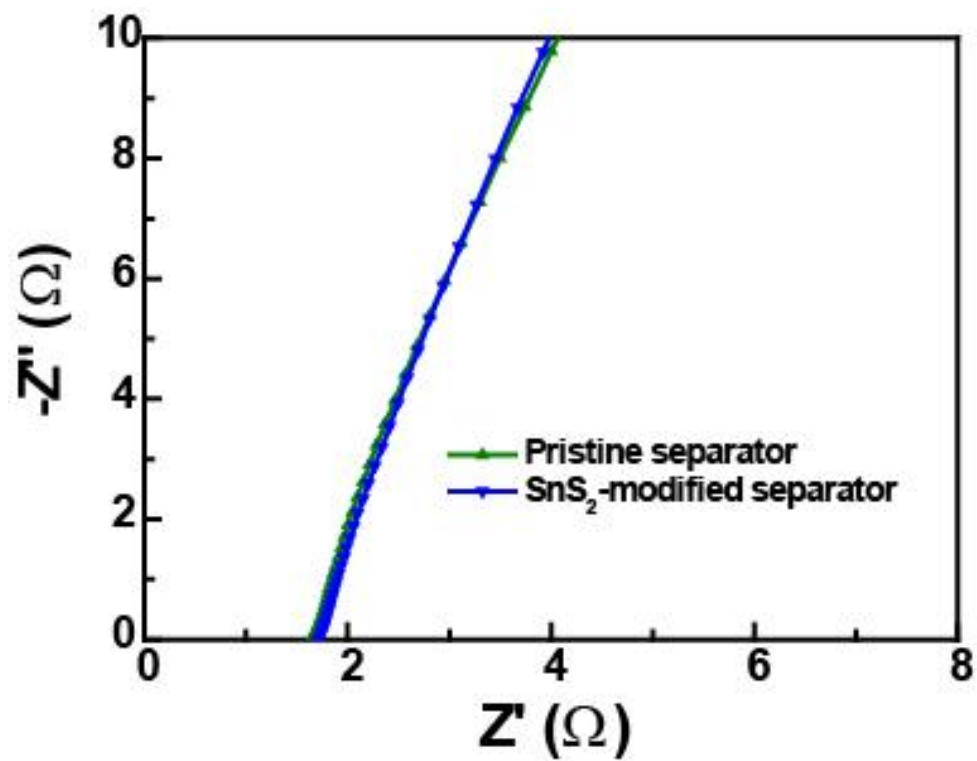

**Fig. S4.** Nyquist plots of the cells (SS/separator/SS) for liquid electrolyte-soaked Pristine separator and SnS<sub>2</sub>-modified separator.



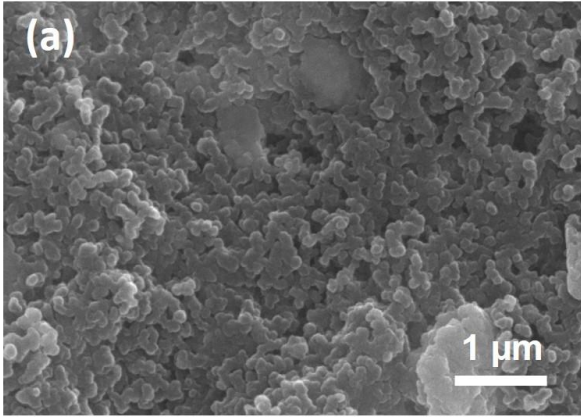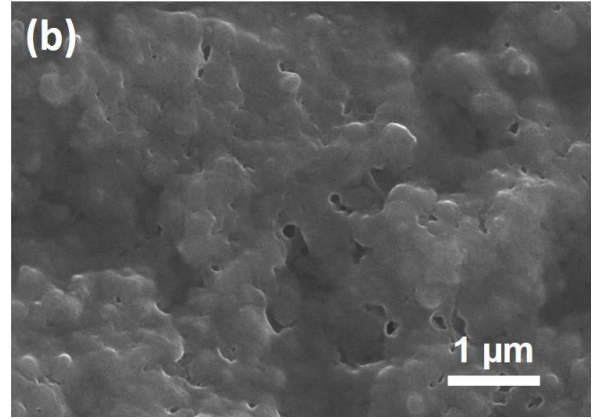

**Fig. S5.** SEM images of the separator (a) before and (b) after cycling at 2 C for 500 cycles, respectively.

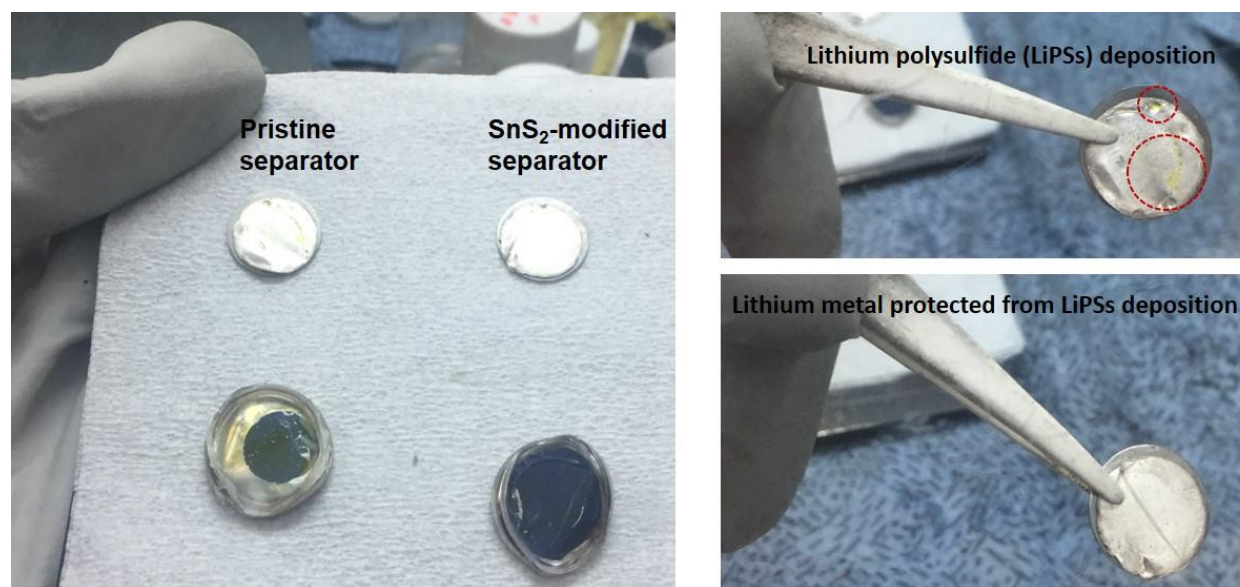

**Fig. S6.** Photographs of Li anode in Li-S cells after 10 cycles.

**Table S1.** Fitted values of the impedance spectra before and after 150 cycles at 0.2 C

| <b>Samples</b>                       | <b>R<sub>s</sub> (<math>\Omega</math>)</b> |                      | <b>R<sub>ct</sub> (<math>\Omega</math>)</b> |                      |
|--------------------------------------|--------------------------------------------|----------------------|---------------------------------------------|----------------------|
|                                      | <b>Fresh cell</b>                          | <b>After cycling</b> | <b>Fresh cell</b>                           | <b>After cycling</b> |
| Pristine separator                   | 2.971                                      | 4.606                | 45.45                                       | 23.74                |
| SnS <sub>2</sub> -modified separator | 3.507                                      | 5.12                 | 28.6                                        | 9.341                |

**Table S2.** A list of calculated values for the lithium-ion diffusion coefficient.

| <b>Diffusion coefficient (cm<sup>2</sup> s<sup>-1</sup>)</b> | <b>Pristine separator</b> | <b>SnS<sub>2</sub> modified separator</b> |
|--------------------------------------------------------------|---------------------------|-------------------------------------------|
| D <sub>Li<sup>+</sup></sub> at peak A (2.3 V)                | 3.176 x 10 <sup>-8</sup>  | 3.2722 x 10 <sup>-7</sup>                 |
| D <sub>Li<sup>+</sup></sub> at peak B (2.0 V)                | 1.792 x 10 <sup>-8</sup>  | 2.22 x 10 <sup>-7</sup>                   |
| D <sub>Li<sup>+</sup></sub> at peak C (2.4 V)                | 1.4996 x 10 <sup>-7</sup> | 9.811 x 10 <sup>-7</sup>                  |

## References

1. G. Henkelman, A. Arnaldsson and H. Jónsson, *Comput. Mater. Sci.*, 2006, **36**, 354-360.
2. W. Tang, E. Sanville and G. Henkelman, *J. Phys. Condens. Mater.*, 2009, **21**.
3. G. Kresse and J. Hafner, *Phys. Rev. B*, 1994, **49**, 14251-14269.
4. G. Kresse and J. Furthmüller, *Phys. Rev. B- Condens. Mater. Phys.*, 1996, **54**, 11169-11186.
5. J. P. Perdew, K. Burke and M. Ernzerhof, *Phys. Rev. Lett.*, 1996, **77**, 3865-3868.
